# Supplementary material for: Ba2B5O8(OH)2(NO3)·3H2O: the design of an alkaline earth metal borate-nitrate optimized from a hydroxylic borate
Source: Royal Society of Chemistry journal article supplement (doi:10.1039/d1dt03660b), 2021-12-20
Supplement: d1dt03660b1.pdf [file d1dt03660b1.pdf]

## ***Supporting Information***

### **Ba<sub>2</sub>B<sub>5</sub>O<sub>8</sub>(OH)<sub>2</sub>(NO<sub>3</sub>)·3H<sub>2</sub>O: the synthesis of an alkaline earth borate-nitrate optimized from a hydroxylic borate**

Huaiyu Hu,<sup>a,b</sup> Junben Huang,<sup>a</sup> Zhiyong Guo,<sup>c</sup> Min Zhang,<sup>\*, a,b</sup> Zihua Yang,<sup>a,b</sup> Shilie Pan<sup>\*, a,b</sup>

- a. CAS Key Laboratory of Functional Materials and Devices for Special Environments; Xinjiang Technical Institute of Physics & Chemistry, CAS; Xinjiang Key Laboratory of Electronic Information Materials and Devices, 40-1 South Beijing Road, Urumqi 830011, China. E-mail: zhangmin@ms.xjb.ac.cn (M. Zhang) , slpan@ms.xjb.ac.cn (S. L. Pan)*
- b. Center of Materials Science and Optoelectronics Engineering, University of Chinese Academy of Sciences, Beijing 100049, China.*
- c. Xuchang Quality and Technical Supervision, Inspection and Testing Center, National Quality Supervision and Inspection Center for Ceramic Products of China, West Section of Longxing Road, Dongcheng District, Xuchang, Henan*

**Table S1.** The final atomic coordinates and equivalent isotropic displacement parameters for  $\text{Ba}_2\text{B}_5\text{O}_8(\text{OH})_2(\text{NO}_3)\cdot 3\text{H}_2\text{O}$ ,  $U_{\text{eq}}$  is defined as one-third of the trace of the orthogonalized  $U_{ij}$  tensor, and the Bond Valence Sum for each atom in the asymmetric unit.

| Atom | <i>x</i>   | <i>y</i>   | <i>z</i>   | $U(\text{eq})$ | BVS  |
|------|------------|------------|------------|----------------|------|
| Ba1  | 0.95251(8) | 0.28847(2) | 0.93260(6) | 0.01464(16)    | 2.22 |
| Ba2  | 0.54796(9) | 0.45620(2) | 0.74455(6) | 0.01891(17)    | 2.07 |
| B1   | 0.0652(14) | 0.3674(4)  | 0.5984(11) | 0.0138(18)     | 3.02 |
| B2   | 0.7834(16) | 0.4332(5)  | 0.4549(11) | 0.0160(19)     | 3.12 |
| B3   | 0.4005(14) | 0.3075(4)  | 0.6975(11) | 0.0123(18)     | 3.01 |
| B4   | 0.7003(14) | 0.3309(4)  | 0.5705(10) | 0.0112(17)     | 2.98 |
| B5   | 0.4423(15) | 0.2476(4)  | 0.9592(11) | 0.0133(18)     | 3.03 |
| N1   | 1.1519(15) | 0.4465(4)  | 1.0110(12) | 0.034(2)       | 4.99 |
| O1   | -0.0002(9) | 0.4199(3)  | 0.5238(8)  | 0.0204(14)     | 1.79 |
| O2   | 0.9793(12) | 0.1829(3)  | 0.7564(8)  | 0.0265(15)     | 1.94 |
| O3   | -0.0707(9) | 0.3228(2)  | 0.6177(7)  | 0.0121(11)     | 2.08 |
| O4   | 0.6459(9)  | 0.3897(3)  | 0.5006(7)  | 0.0150(12)     | 1.88 |
| O5   | 0.2741(8)  | 0.3620(3)  | 0.6499(7)  | 0.0143(12)     | 2.00 |
| O6   | 0.6168(9)  | 0.3237(3)  | 0.7118(6)  | 0.0129(12)     | 1.99 |
| O7   | 0.3395(9)  | 0.2402(3)  | 1.0778(7)  | 0.0137(12)     | 1.96 |
| O8   | 0.3529(8)  | 0.2870(3)  | 0.8460(6)  | 0.0122(12)     | 1.96 |
| O9   | 0.7277(10) | 0.4921(3)  | 0.5094(8)  | 0.0209(14)     | 2.06 |
| O10  | 0.6245(9)  | 0.2189(3)  | 0.9581(7)  | 0.0140(12)     | 2.03 |
| O11  | 0.6379(11) | 0.3759(3)  | 1.0085(8)  | 0.0279(16)     | 1.93 |
| O12  | 1.3045(13) | 0.4703(4)  | 0.9758(9)  | 0.0389(19)     | 2.07 |
| O13  | 0.7552(12) | 0.4339(4)  | 0.2836(8)  | 0.0292(16)     | 1.53 |
| O14  | 0.6489(15) | 0.6446(4)  | 0.7659(11) | 0.047(2)       | 2.45 |
| O15  | 1.1043(14) | 0.4627(4)  | 1.1384(9)  | 0.043(2)       | 1.70 |
| O16  | 1.0463(16) | 0.4103(4)  | 0.9245(10) | 0.050(2)       | 2.03 |

**Table S2.** Bond lengths (Å) and angles (°) for Ba<sub>2</sub>B<sub>5</sub>O<sub>8</sub>(OH)<sub>2</sub>(NO<sub>3</sub>)·3H<sub>2</sub>O

|             |           |               |           |
|-------------|-----------|---------------|-----------|
| Ba1-O3#1    | 2.842(6)  | Ba2-O4        | 2.788(6)  |
| Ba1-O3#2    | 2.974(6)  | Ba2-O5        | 2.780(6)  |
| Ba1-O6      | 2.747(6)  | Ba2-O6        | 2.994(6)  |
| Ba1-O7#1    | 2.831(6)  | Ba2-O9#4      | 2.818(6)  |
| Ba1-O8#1    | 2.913(5)  | Ba2-O9        | 2.712(7)  |
| Ba1-O2      | 2.832(7)  | Ba2-O11       | 2.886(7)  |
| Ba1-O2#3    | 2.884(7)  | Ba2-O12#5     | 2.941(8)  |
| Ba1-O10     | 2.716(6)  | Ba2-O12#6     | 2.864(7)  |
| Ba1-O11     | 3.023(7)  | Ba2-O13#4     | 3.136(8)  |
| Ba1-O16     | 2.774(8)  | Ba2-O15#5     | 2.939(9)  |
| B1-O3       | 1.374(10) | B3-O5         | 1.481(11) |
| B1-O5       | 1.372(11) | B3-O6         | 1.460(11) |
| B1-O1       | 1.360(11) | B3-O8         | 1.476(10) |
| B2-O4       | 1.441(11) | B3#3-O7       | 1.487(11) |
| B2-O9       | 1.465(12) | B4-O4         | 1.452(10) |
| B2-O13      | 1.478(12) | B4-O6         | 1.470(10) |
| B2#6-O1     | 1.469(12) | B4-O3#1       | 1.502(10) |
| B5-O7       | 1.368(11) | B4-O10#8      | 1.497(11) |
| B5-O8       | 1.364(11) | B4#6-O3       | 1.502(11) |
| B5-O10      | 1.368(11) | B4#3-O10      | 1.497(11) |
| N1-O12      | 1.237(12) | N1-O15        | 1.276(12) |
| N1-O16      | 1.222(12) | O5-B1-O3      | 122.8(8)  |
| O1-B1-O3    | 121.5(8)  | O1-B1-O5      | 115.7(7)  |
| O4-B2-O9    | 106.8(7)  | O4-B2-O1#1    | 111.9(7)  |
| O4-B2-O13   | 109.7(8)  | O9-B2-O1#1    | 109.6(8)  |
| O9-B2-O13   | 109.6(7)  | O1#1-B2-O13   | 109.1(7)  |
| O5-B3-O7#8  | 108.9(7)  | O6-B3-O5      | 108.2(7)  |
| O6-B3-O7#8  | 110.8(7)  | O6-B3-O8      | 112.8(7)  |
| O8-B3-O5    | 106.7(7)  | O8-B3-O7#8    | 109.3(7)  |
| O4-B4-O3#1  | 111.9(7)  | O4-B4-O6      | 110.5(7)  |
| O4-B4-O10#8 | 111.2(7)  | O6-B4-O3#1    | 106.9(6)  |
| O6-B4-O10#8 | 110.0(7)  | O10#8-B4-O3#1 | 106.0(6)  |
| O8-B5-O7    | 114.9(8)  | O8-B5-O10     | 123.0(8)  |
| O10-B5-O7   | 122.1(8)  | O12-N1-O15    | 117.7(9)  |
| O16-N1-O12  | 121.3(10) | O16-N1-O15    | 121.0(10) |

Symmetry transformations used to generate equivalent atoms:

#1 1+x,+y,+z; #2 1+x,1/2-y,1/2+z; #3 +x,1/2-y,1/2+z; #4 1-x,1-y,1-z; #5 2-x,1-y,2-z; #6 -1+x,+y,+z; #7 -1+x,1/2-y,-1/2+z; #8 +x,1/2-y,-1/2+z

**Table S3.** crystal data and structure refinement for Ba<sub>2</sub>B<sub>5</sub>O<sub>8</sub>(OH)<sub>2</sub>(NO<sub>3</sub>)·3H<sub>2</sub>O and Ba<sub>2</sub>B<sub>5</sub>O<sub>8</sub>(OH)<sub>2</sub>OH

|                                                                                                     |                                                                                                      |                                                                                   |
|-----------------------------------------------------------------------------------------------------|------------------------------------------------------------------------------------------------------|-----------------------------------------------------------------------------------|
| Empirical formula                                                                                   | Ba <sub>2</sub> B <sub>5</sub> O <sub>8</sub> (OH) <sub>2</sub> (NO <sub>3</sub> )·3H <sub>2</sub> O | Ba <sub>2</sub> B <sub>5</sub> O <sub>8</sub> (OH) <sub>2</sub> OH <sup>[b]</sup> |
| Formula weight                                                                                      | 606.80                                                                                               | 507.7480                                                                          |
| Temperature                                                                                         | 301.0                                                                                                | Room temperature                                                                  |
| Crystal system,<br>space group                                                                      | Monoclinic, <i>P2<sub>1</sub>/c</i>                                                                  | Monoclinic, <i>P2<sub>1</sub>/c</i>                                               |
| Unit cell<br>dimensions                                                                             | a = 6.6406(6),<br>b = 22.157(2) Å, β = 101.980(4)°<br>c = 8.7863(6),                                 | a = 6.713(2),<br>b = 16.480(5) Å, β = 106.80(3)°<br>c = 8.387(3),                 |
| Volume                                                                                              | 1264.60(19) Å <sup>3</sup>                                                                           | 888.3(5) Å <sup>3</sup>                                                           |
| Z, Calculated<br>density                                                                            | 4, 3.187 g·cm <sup>-3</sup>                                                                          | 4, 3.80 g·cm <sup>-3</sup>                                                        |
| Absorption<br>coefficient                                                                           | 6.287 mm <sup>-1</sup>                                                                               | /                                                                                 |
| <i>F</i> (000)                                                                                      | 1120.0                                                                                               | /                                                                                 |
| Theta range for<br>data collection                                                                  | 1.84 to 27.51°                                                                                       | /                                                                                 |
| Limiting indices                                                                                    | -8 ≤ <i>h</i> ≤ 8, -25 ≤ <i>k</i> ≤ 28, -11 ≤ <i>l</i> ≤ 11                                          | /                                                                                 |
| Reflections<br>collected / unique                                                                   | 12257 / 2904 [ <i>R</i> (int) = 0.0818]                                                              | /                                                                                 |
| Completeness                                                                                        | 99.6%                                                                                                | /                                                                                 |
| Data / restraints /<br>parameters                                                                   | 2904/11/232                                                                                          | /                                                                                 |
| Goodness-of-fit on<br><i>F</i> <sup>2</sup>                                                         | 1.079                                                                                                | /                                                                                 |
| Final <i>R</i> indices<br>[ <i>F</i> o <sup>2</sup> > 2σ( <i>F</i> o <sup>2</sup> )] <sup>[a]</sup> | <i>R</i> <sub>1</sub> = 0.0398, <i>wR</i> <sub>2</sub> = 0.0899                                      | /                                                                                 |
| <i>R</i> indices (all<br>data) <sup>[a]</sup>                                                       | <i>R</i> <sub>1</sub> = 0.0502, <i>wR</i> <sub>2</sub> = 0.1012                                      | /                                                                                 |
| Largest diff. peak<br>and hole                                                                      | 1.46 and -1.33e·Å <sup>-3</sup>                                                                      | /                                                                                 |

[a]  $R_1 = \sum ||F_o| - |F_c|| / \sum |F_o|$  and  $wR_2 = [\sum w (F_o^2 - F_c^2)^2 / \sum w F_o^4]^{1/2}$  for  $F_o^2 > 2\sigma(F_o^2)$

[b] O. Ferro, S. Merlino, S. A. Vinogradova, D. Y. Pushcharovsky and O. V. Dimitrova, *J. Alloys Compd.*, 2000, **305**, 63-71.

**Table S4.** All of the borate-nitrates up till now

| Type of the element      | The formula of the compound                                                  | B-O anion framework                                   | ICSD No. or reference |
|--------------------------|------------------------------------------------------------------------------|-------------------------------------------------------|-----------------------|
| Alkali metal             | $K_3Na[B_6O_9(OH)_3]NO_3$                                                    | Isolated $[B_6O_9(OH)_3]^{3-}$                        | 427967                |
|                          | $Na_3(NO_3)[B_6O_{10}]$                                                      | $^3_{\infty}[B_6O_{10}]^{2-}$                         | 97687                 |
|                          | $Na_{3-x}K_x[B_6O_{10}]NO_3$ (x = 0.5, 0.6, 0.7)                             | $^3_{\infty}[B_6O_{10}]^{2-}$                         | 432294-432296         |
|                          | $M_3B_6O_{10}(NO_3)$ (M=K,Rb)                                                | $^3_{\infty}[B_6O_{10}]^{2-}$                         | [a]                   |
|                          | $Cs_3B_8O_{13}NO_3$                                                          | $^3_{\infty}[B_8O_{13}]^{2-}$                         | [b]                   |
| Lanthanide series metals | $Ce[B_5O_8(OH)(H_2O)]NO_3 \cdot H_2O$                                        | $^2_{\infty}[B_5O_8(OH)(H_2O)]^{2-}$                  | 262731                |
|                          | $La[B_5O_8(OH)]NO_3 \cdot 2H_2O$                                             | $^2_{\infty}[B_5O_8(OH)]^{2-}$                        | 426014                |
|                          | $La[B_5O_8(OH)(H_2O)]NO_3 \cdot 2H_2O$                                       | $^2_{\infty}[B_5O_8(OH)(H_2O)]^{2-}$                  | [c]                   |
|                          | $Lu_2B_2O_5(NO_3)_2 \cdot 2H_2O$                                             | Isolated $[B_2O_5]^{4-}$                              | 430158                |
|                          | $Pr[B_5O_8(OH)(H_2O)_{0.87}]NO_3 \cdot 2H_2O$                                | $^2_{\infty}[B_5O_8(OH)(H_2O)_{0.87}]^{2-}$           | 433274                |
|                          | $RE[B_5O_8(OH)(H_2O)_x]NO_3 \cdot 2H_2O$<br>[RE = Nd (x = 0.85), Sm (x = 0)] | $^2_{\infty}[B_5O_8(OH)(H_2O)_x]^{2-}$                | 431164                |
| Np                       | $K_2[(NpO_2)_3B_{10}O_{16}(OH)_2(NO_3)_2]$                                   | $^2_{\infty}[B_5O_8(OH)]^{2-}$                        | 168519                |
| Pb                       | $[Pb_6(\mu_4-O)_4(BO_3)](NO_3)$                                              | Isolated $[BO_3]^{3-}$                                | [d]                   |
|                          | $H[Pb_6(\mu_3-O)_2(BO_3)_2](NO_3)_3$                                         | Isolated $[BO_3]^{3-}$                                | [d]                   |
|                          | $H[Pb_8(\mu_4-O)_3(\mu_3-O)(BO_3)_2](NO_3)_3$                                | Isolated $[BO_3]^{3-}$                                | [d]                   |
|                          | $Pb_2(BO_3)(NO_3)$                                                           | Isolated $[BO_3]^{3-}$                                | 428943                |
|                          | $[Pb_3(B_3O_7)](NO_3)$                                                       | Isolated $[B_3O_7]^{5-}$                              | 250750                |
| Co,Ni,Cu,Zn,Cd           | $M_3B_7O_{13}(NO_3)$                                                         | $^3_{\infty}[B_7O_{13}]^{5-}$                         | [e]                   |
|                          | $K_7Ni[B_{18}O_{24}(OH)_9](NO_3)_6 \cdot (H_3BO_3)$                          | Isolated $[B_{18}O_{24}(OH)_9]^{3-}$<br>And $H_3BO_3$ | 766                   |
|                          | $Cd_3[B_6O_9(OH)_2]_2 \cdot 2NO_3 \cdot 4H_2O$                               | $^2_{\infty}[B_6O_9(OH)_2]^{2-}$                      | 18367                 |

[a] Q. Q. Zhang, F. F. Zhang, F. M. Li, S. J. Han, Z. H. Yang and S. L. Pan, *Eur. J. Inorg. Chem.*, **2021**, 1297-1304

[b] Z. L. Chen, C. F. Wu, H. Zeng and F. Yu, *Dalton Trans.*, 2021, **50**, 8676-8679.

[c] L. Y. Li, G. B. Li, F. H. Liao and J. H. Lin, *Acta Phys. -Chim. Sin.*, 2005, **21**, 769-773.

[d] J. L. Song, X. Xu, C. L. Hu, F. Kong and J. G. Mao, *CrystEngComm*, 2015, **17**, 3953-3960.

[e] T. A. Bither and H. S. Young, *J. Solid State Chem.*, 1974, **10**, 302-311.

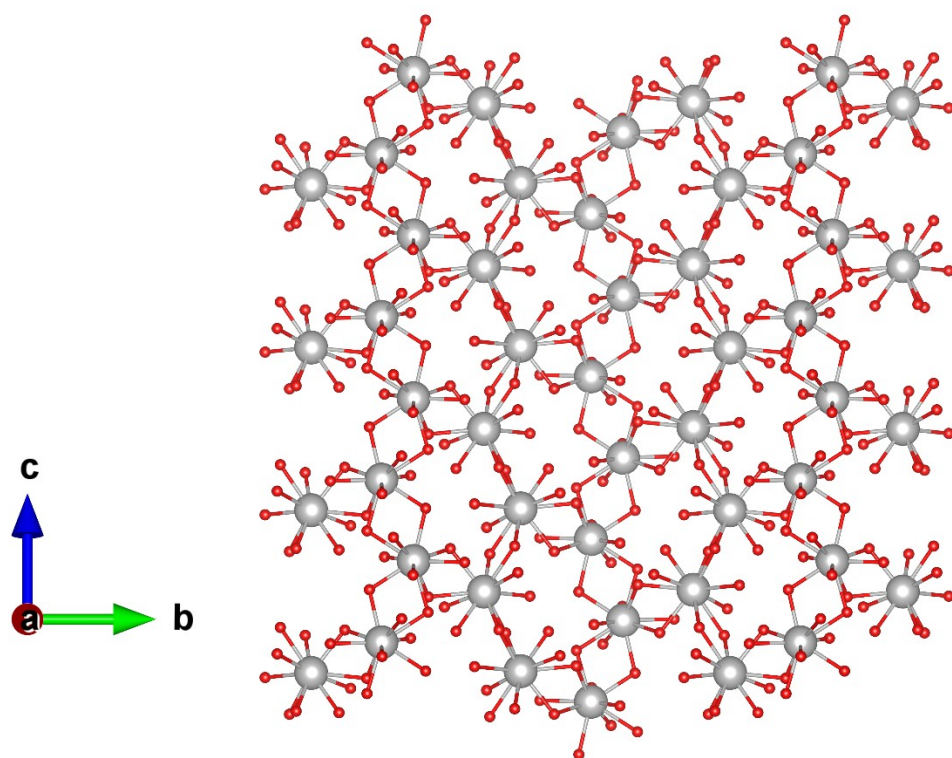

**Figure S1.** The Ba-O layer of  $\text{Ba}_2\text{B}_5\text{O}_8(\text{OH})_2(\text{NO}_3)\cdot 3\text{H}_2\text{O}$

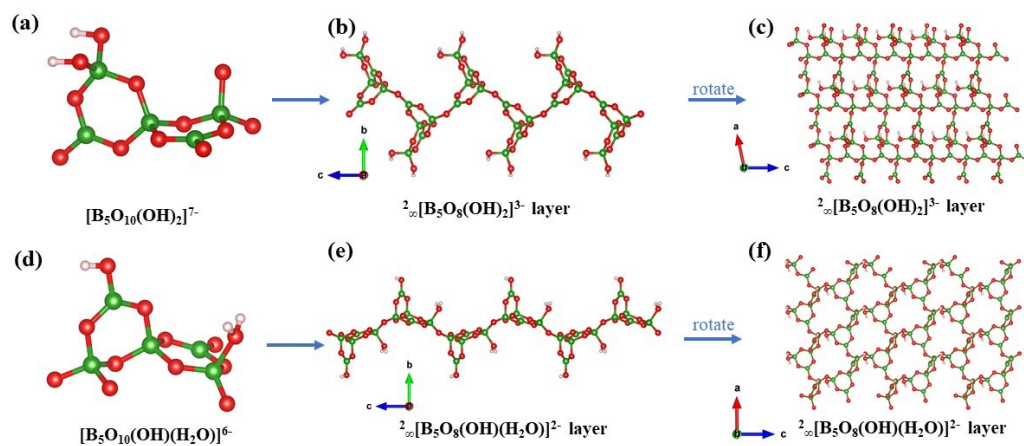

**Figure S2.** The B-O anions of  $\text{Ba}_2\text{B}_5\text{O}_8(\text{OH})_2(\text{NO}_3)\cdot 3\text{H}_2\text{O}$  and  $\text{Ce}[\text{B}_5\text{O}_8(\text{OH})(\text{H}_2\text{O})]\text{NO}_3\cdot \text{H}_2\text{O}$ . (a)(d) the fundamental basic units, (b)(c) the  $2_\infty[\text{B}_5\text{O}_8(\text{OH})_2]^{3-}$  layer and (e)(f) the  $2_\infty[\text{B}_5\text{O}_8(\text{OH})(\text{H}_2\text{O})]^{2-}$  layer of  $\text{Ba}_2\text{B}_5\text{O}_8(\text{OH})_2(\text{NO}_3)\cdot 3\text{H}_2\text{O}$  and  $\text{Ce}[\text{B}_5\text{O}_8(\text{OH})(\text{H}_2\text{O})]\text{NO}_3\cdot \text{H}_2\text{O}$ , respectively.

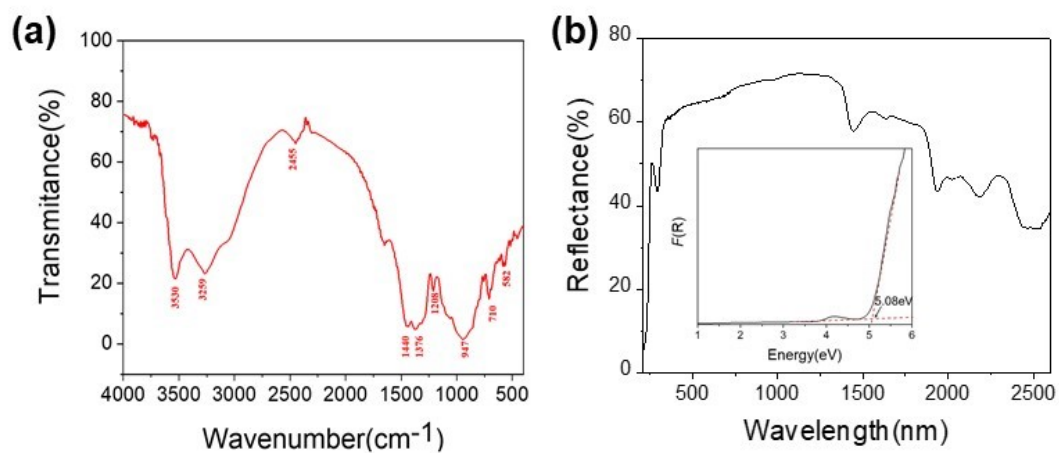

**Figure S3.** (a) infrared spectra and (b) UV-Vis-NIR diffuse reflectance of  $\text{Ba}_2\text{B}_5\text{O}_8(\text{OH})_2(\text{NO}_3)\cdot 3\text{H}_2\text{O}$

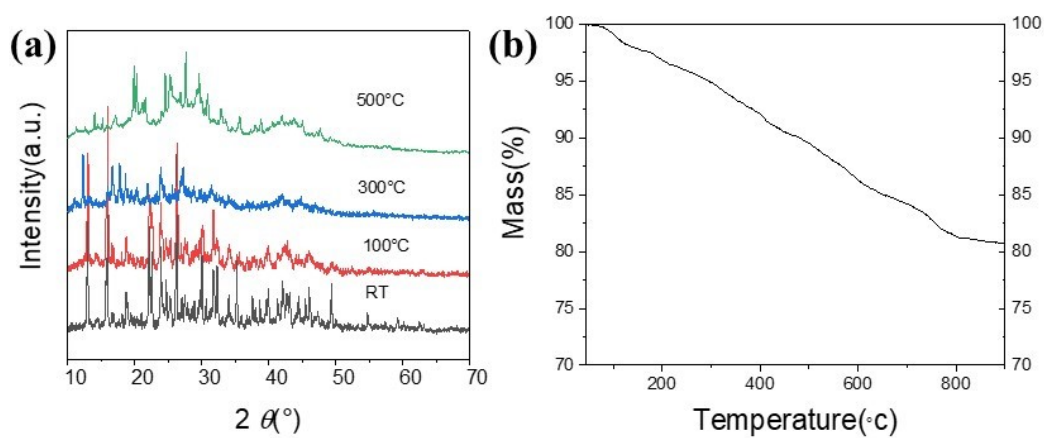

**Figure S4.** (a) PXRD and (b) TG curves of  $\text{Ba}_2\text{B}_5\text{O}_8(\text{OH})_2(\text{NO}_3)\cdot 3\text{H}_2\text{O}$  at different temperatures.

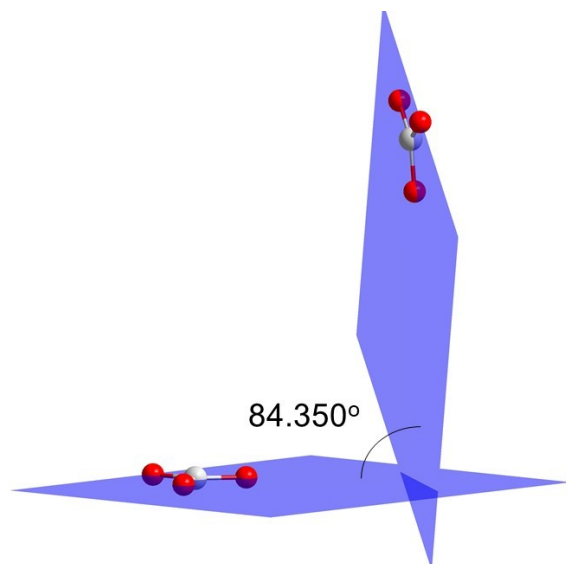

**Figure S5.** The dihedral angles of the nonparallel arrangement [NO<sub>3</sub>]<sup>-</sup> anions
